# Supplementary material
Source: publisher site journal article supplement (https://www.dovepress.com/article/585692)
Supplement: Supplementary file 1 [file 585692%20Supplementary%20Material.docx]

**Supplementary Materials**

**Supplementary Table 1. Model inputs and their sources**

| **Model inputs** | | | **Estimates** | | **Source** | | |
| --- | --- | --- | --- | --- | --- | --- | --- |
| **Base case** | **Range** |
| Epidemiological and clinical data | | | | | | | |
| Reference population | | | 289,196 | NA | AIHW6 | | |
| Proportion of eligible women | | | 17.5% | NA | Simmonds et al. 202012 | | |
| Proportion of early preterm birth stratified by the gestational age at delivery | Extremely (20-27 weeks) | | 21% | NA | AIHW6 | | |
| Moderately (28-31 weeks) | | 35% |
| Late (32-36 weeks) | | 44% |
| Relative risk for early preterm birth | | | 0.23 | 0.07-0.79 | Simmonds et al. 202012 | | |
| Testing coverage | | | 80% | 60%-100% | Expert opinion and data from SAMSAS20 | | |
| Adherence rate | | | 65% | 54%-78% | Makrides et al 201911, Simmonds et al. 202012, expert opinion | | |
| Cost data | | | | | | | |
| **Cost items** | | **Prematurity** | **Mean cost** | **Lower cost** | | **Upper cost** | **Source** |
| Birth cost | | Extremely (20-27 weeks) | $7,322 | $5,795 | | $8,676 | Newnham et al. 20224 |
| Moderately (28-31 weeks) | $12,803 | $10,098 | | $15,318 |
| Late (32-36 weeks) | $9,730 | $7,878 | | $11,551 |
| Term (≥ 37 weeks) | $8,506 | $6,921 | | $10,165 |
| Neonatal admission | | Extremely (20-27 weeks) | $174,434 | $142,388 | | $207,477 | Newnham et al. 20224 |
| Moderately (28-31 weeks) | $72,188 | $57,502 | | $86,181 |
| Late (32-36 weeks) | $24,409 | $19,721 | | $29,160 |
| Term (≥ 37 weeks) | $9,655 | $7,736 | | $11,498 |
| Hospitalisations (ages 0-5) | | Extremely (20-27 weeks) | $3,578 | $2,865 | | $4,330 | Newnham et al. 20224 |
| Moderately (28-31 weeks) | $3,578 | $2,874 | | $4,279 |
| Late (32-36 weeks) | $3,565 | $2,833 | | $4,251 |
| Term (≥ 37 weeks) | $3,584 | $2,894 | | $4,300 |
| Hospitalisations (ages 6-12) | | Extremely (20-27 weeks) | $3,665 | $2,989 | | $4,345 | Newnham et al. 20224 |
| Moderately (28-31 weeks) | $3,665 | $2,933 | | $4,406 |
| Late (32-36 weeks) | $3,593 | $2,921 | | $4,288 |
| Term (≥ 37 weeks) | $3,581 | $2,879 | | $4,304 |
| Hospitalisations (ages 13-18) | | Extremely (20-27 weeks) | $3,654 | $2,982 | | $4,351 | Newnham et al. 20224 |
| Moderately (28-31 weeks) | $3,654 | $2,874 | | $4,389 |
| Late (32-36 weeks) | $3,558 | $2,825 | | $4,330 |
| Term (≥ 37 weeks) | $3,530 | $2,856 | | $4,200 |
| MBS (ages 0-4) | | Extremely (20-27 weeks) | $583 | $519 | | $646 | Newnham et al. 20224 |
| Moderately (28-31 weeks) | $583 | $519 | | $645 |
| Late (32-36 weeks) | $594 | $545 | | $643 |
| Term (≥ 37 weeks) | $514 | $498 | | $529 |
| MBS (ages 5-9) | | Extremely (20-27 weeks) | $382 | $334 | | $429 | Newnham et al. 20224 |
| Moderately (28-31 weeks) | $382 | $337 | | $428 |
| Late (32-36 weeks) | $355 | $322 | | $391 |
| Term (≥ 37 weeks) | $314 | $304 | | $323 |
| PBS (ages 0-4) | | Extremely (20-27 weeks) | $42 | $1 | | $70 | Newnham et al. 20224 |
| Moderately (28-31 weeks) | $42 | $14 | | $70 |
| Late (32-36 weeks) | $51 | $25 | | $76 |
| Term (≥ 37 weeks) | $29 | $25 | | $34 |
| PBS (ages 5-9) | | Extremely (20-27 weeks) | $68 | $27 | | $108 | Newnham et al. 20224 |
| Moderately (28-31 weeks) | $68 | $24 | | $113 |
| Late (32-36 weeks) | $46 | $28 | | $62 |
| Term (≥ 37 weeks) | $29 | $25 | | $33 |
| Primary school | | Extremely (20-27 weeks) | $23,206 | $18,843 | | $27,943 | Newnham et al. 20224 |
| Moderately (28-31 weeks) | $16,831 | $13,604 | | $20,129 |
| Late (32-36 weeks) | $15,128 | $12,027 | | $18,039 |
| Term (≥ 37 weeks) | $14,309 | $11,717 | | $17,008 |
| High school | | Extremely (20-27 weeks) | $26,391 | $21,322 | | $31,812 | Newnham et al. 20224 |
| Moderately (28-31 weeks) | $20,115 | $16,126 | | $24,188 |
| Late (32-36 weeks) | $18,264 | $14,411 | | $21,933 |
| Term (≥ 37 weeks) | $17,647 | $14,104 | | $20,929 |
| Out-of-pocket cost | | Extremely (20-27 weeks) | $3,139 | $2,840 | | $3,437 | Fox et al. 202121 |
| Moderately (28-31 weeks) | $3,139 | $2,840 | | $3,437 |
| Late (32-36 weeks) | $1,635 | $1,564 | | $1,707 |
| Term (≥ 37 weeks) | $1,334 | $1,312 | | $1,357 |
| Wage loss | | Extremely (20-27 weeks) | $62,178 | $61,876 | | $62,481 | Fox et al. 202121 |
| Moderately (28-31 weeks) | $62,178 | $61,876 | | $62,481 |
| Late (32-36 weeks) | $56,844 | $56,543 | | $57,144 |
| Term (≥ 37 weeks) | $38,101 | $37,970 | | $38,231 |
| Testing cost | |  | $50 | $25 | | $75 | SA Pathology20 and Expert opinion |
| Cost of Omega-3 | |  | $100 | $80 | | $120 | Market prices and expert opinion |

All costs are presented in Australian dollars. Sources are indicated by superscript reference numbers corresponding to the references list in the manuscript.

**Abbreviations**: AIHW: Australian Institute of Health and Welfare; SAMSAS: Maternal Serum Antenatal Screening program in South Australia; MBS: Medicare Benefits Schedule; NA = not applicable; PBS: Pharmaceutical Benefits Scheme.

**Supplementary Table 2**: **Comparison of the proposed model with previous approaches in preterm birth economic evaluation**

| **No** | **Study** | **Intervention** | **Model type** | **Perspective** | **Costs included** | **Key limitations** | **Improvements in current study** |
| --- | --- | --- | --- | --- | --- | --- | --- |
| **1** | The health and educational costs of preterm birth to 18 years of age in Australia | PTB across gestational age groups (extremely preterm 20–27 wks through to late preterm 32–36 wks) vs. term, a cost-of-illness study, no clinical intervention modelled | Decision-analytic model with a hypothetical cohort of 314,814 children (2016 live births), with costs from birth to age 18, discounted at 3.5% p.a. | Australian government across all 8 jurisdictions [health system + educational sector only] | Total annual cost estimated at AUD $1.413 billion (95% CI $1.047B–$1.781B); two-thirds borne by healthcare during the newborn period and one-quarter by educational services providing special assistance PubMed; also includes MBS/PBS, neonatal transport, and post-discharge hospitalisations to age 18 | Government perspective only. It excludes parental productivity loss and family costs; no screening intervention or adherence modelling; disability/special education needs imputed from literature rather than linked data; no CEA or ICER produced | Our study builds on this Australian framework by adding a specific screening intervention with real-world adherence rates, expanding to a full societal perspective, and enabling CEA with ICER estimation. |
| **2** | Health economic evaluations of programs reducing preterm birth: A scoping review1. | Multiple PTB prevention programs (pharmacological, telemedicine, doula care, nutrition, maternity redesign) | Scoping Review synthesising CEA, CBA, CUA across 15 studies | Multiple (varied across reviewed studies) | Healthcare costs, intervention costs, downstream neonatal/child costs; some studies included family costs | Heterogeneous methodologies limit comparability; no long-term follow-up beyond early childhood; screening adherence not modelled; societal productivity losses not consistently captured | Integrates screening adherence rates, societal costs (productivity, education), and outcomes tracked to age 18, filling the long-term gap identified by this review |
| **3** | Economic consequences of preterm birth: a systematic review of the recent literature (2009–2017)2 | Broad PTB interventions reviewed across 43 included studies (2009–2017) | Systematic Cost-of-Illness Review; narrative synthesis of costing approaches | Health system and societal (varied) | Neonatal ICU, rehospitalisation, developmental services; some family costs. Excludes adult economic consequences, educational costs, and family lost productivity | Does not model screening adherence; adult outcomes largely missing; no QALYs or CEA; family costs inconsistently captured; no unified model | Current study extends the time horizon to age 18, incorporates educational cost outcomes and a unified adherence-adjusted decision-analytic model. |
| **4** | The cost of preterm birth throughout childhood in England and Wales  3 | PTB at varying gestational ages vs. term birth (no specific clinical intervention modelled) | Decision-Analytic Markov Model; time horizon to age 18 | Public sector (UK NHS + education + social services) | Neonatal care, community health, education (special needs), social services; excludes productivity loss, family costs, and adherence adjustment | Screening adherence not incorporated; no societal productivity perspective; intervention-specific CEA not performed; does not model prevention pathways | Current study builds on this framework by adding intervention-specific screening adherence and societal costs (parental productivity), extending to a full societal perspective. |
| **5** | Universal cervical length screening and treatment with vaginal progesterone to prevent preterm birth: a decision and economic analysis  4 | Universal cervical length (CL) screening + vaginal progesterone vs. risk-based strategies vs. no screening | Decision-Analytic Model; ICER calculated with QALYs; one-way sensitivity analysis | US payer (third-party insurer) | Screening costs, progesterone treatment, neonatal hospitalisation (short-term); excludes long-term child development, educational costs, and societal costs | Short time horizon (neonatal only); adherence to screening assumed at 100%; no societal perspective; long-term outcomes (education, adult productivity) not included | Current study incorporates real-world screening adherence rates, extends costs to age 18 including education, and adopts a full societal perspective. |
| **6** | Vaginal progesterone versus cervical cerclage for the prevention of preterm births in women with a sonographically short cervix-a cost effectiveness and decision analysis5 | Vaginal progesterone vs. cervical cerclage for short cervix identified on ultrasound | Cost-Utility Analysis (CUA); Probabilistic Sensitivity Analysis (PSA); Monte Carlo simulation | US clinical/payer | Procedure costs, neonatal intensive care; no long-term costs beyond neonatal period; education and societal costs excluded. | No adherence modelling; time horizon limited to perinatal period; ignores downstream costs (schooling, special education, lost parental productivity). | Current study adds adherence as a parameter, extends the model to age 18, and captures downstream societal and educational costs. |
| **7** | Economic costs at age five associated with very preterm birth: multinational European cohort study**6** | Very preterm birth (<32 weeks) vs. moderate/late preterm; cost comparison at age 5 | Generalised Linear Model (GLM); cross-sectional economic costing; 11-country European cohort. | Societal (11 European countries) | Healthcare, education (to age 5), social services, family out-of-pocket and productivity loss up to age 5, which is most comprehensive societal cost set in the literature. | Time horizon limited to age 5; no intervention modelled; no adherence component; cannot assess cost-effectiveness; results not generalisable beyond Europe. | Current study extends the societal cost framework used here to age 18, integrates a specific screening intervention with adherence modelling, and enables full CEA. |
| **8** | **Current study** | Omega-3 testing + supplementation | Decision-analytic model | Healthcare + societal | Direct + educational + family + productivity | -- | Integrates screening, adherence, societal, and long-term outcomes |

**Note**: AUD = Australian Dollar; CEA = Cost-Effectiveness Analysis; CBA = Cost-Benefit Analysis; CUA = Cost-Utility Analysis; ICER = Incremental Cost-Effectiveness Ratio; QALY = Quality-Adjusted Life Year; PSA = Probabilistic Sensitivity Analysis; GLM = Generalised Linear Model; PTB = Preterm Birth.

**Supplementary References**

1. Chadha A, Moore S, Kildea S, Gao Y. Health economic evaluations of programs reducing preterm birth: A scoping review. *Int J Nurs Stud Adv*. Dec 2024;7:100228. doi:10.1016/j.ijnsa.2024.100228

2. Petrou S, Yiu HH, Kwon J. Economic consequences of preterm birth: a systematic review of the recent literature (2009-2017). *Arch Dis Child*. May 2019;104(5):456–465. doi:10.1136/archdischild-2018-315778

3. Mangham LJ, Petrou S, Doyle LW, Draper ES, Marlow N. The cost of preterm birth throughout childhood in England and Wales. *Pediatrics*. Feb 2009;123(2):e312–27. doi:10.1542/peds.2008-1827

4. Cahill AG, Odibo AO, Caughey AB, et al. Universal cervical length screening and treatment with vaginal progesterone to prevent preterm birth: a decision and economic analysis. *Am J Obstet Gynecol*. Jun 2010;202(6):548 e1–8. doi:10.1016/j.ajog.2009.12.005

5. Eke A, Buras A, Drnec S, Woo J. 756: Vaginal progesterone versus cervical cerclage for the prevention of preterm births in women with a sonographically short cervix–a cost effectiveness and decision analysis. *American Journal of Obstetrics and Gynecology*. 2015;212(1):S367–S368. doi:10.1016/j.ajog.2014.10.962

6. Kim SW, Andronis L, Seppanen AV, et al. Economic costs at age five associated with very preterm birth: multinational European cohort study. *Pediatr Res*. Sep 2022;92(3):700–711. doi:10.1038/s41390-021-01769-z
